# Supplementary material for: Survey on the Prevalence of Buruli Ulcer among Patients with Persistent Wounds in Imo State, Nigeria
Source: Research Square preprint supplement (doi:10.21203/rs.3.rs-7470652/v1), 2025-10-08
Supplement: Supplementary file 1 [file a09ba4a27d5770c62bcef496.docx]

# QUESTIONNAIRE

**Survey on the Prevalence of Buruli Ulcer among Patients with Persistent Wounds in Imo State, Nigeria (English Version)**

**A0. Facility code:** ____ **A1. Study ID:** ________ **A2. Interview date:** **/**/____ **A3. Interviewer ID:**

**Introduction & Confidentiality Statement**

“Good day. We are conducting a study on persistent wounds to improve diagnosis and treatment in Imo State. This interview will take about 15–25 minutes. Your participation is completely voluntary. You may choose to skip any question or stop the interview at any time. All your responses will be kept confidential and linked only to a study ID number; your name will not appear on the data. There is no payment for participation, and your decision will not affect the care you receive. With your permission, we will also record clinical findings and collect samples for laboratory testing.”

## Section A: Socio-Demographic Information (Tick as appropriate)

A1. Age (in years): ______

A2. Sex: ☐ Male ☐ Female

A3. Marital Status: ☐ Single ☐ Married ☐ Divorced/Separated ☐ Widowed

A4. Educational Level: ☐ None ☐ Primary ☐ Secondary ☐ Tertiary

A5. Occupation: __________________________

A6. Place of residence (village/town): __________________________

A7. Duration of residence in this community (years): ______

## Section B: Clinical History

B1. Do you currently have a wound lasting more than 2 weeks? ☐ Yes ☐ No

B2. If yes, where is the wound located? ☐ Upper limb ☐ Lower limb ☐ Trunk ☐ Other: ______

B3. How long has the wound been present? ______ weeks/months

B4. Have you had similar wounds in the past? ☐ Yes ☐ No

B5. Have you received any treatment for this wound? ☐ Yes ☐ No

B6. If yes, what type of treatment? ☐ Hospital ☐ Traditional healer ☐ Self-medication ☐ Other: ______

B7. Has any health worker ever suggested your wound might be Buruli ulcer? ☐ Yes ☐ No

## Section C: Health-Seeking Behaviour

C1. Where did you first seek care for this wound? ☐ Hospital ☐ Pharmacy ☐ Traditional healer ☐ Herbalist ☐ None

C2. What influenced your choice of first treatment? ☐ Cost ☐ Distance ☐ Belief in effectiveness ☐ Family decision ☐ Other: ______

C3. How many times have you visited a health facility for this wound? ______

C4. Have you ever been referred to a hospital for your wound? ☐ Yes ☐ No

C5. Have you ever stopped treatment before completing it? ☐ Yes ☐ No

C6. If yes, why? ☐ Cost ☐ Distance ☐ Side effects ☐ Perceived ineffectiveness ☐ Other: ______

## Section D: Environmental and Exposure History

D1. Do you frequently engage in activities in rivers, streams, or swamps? ☐ Yes ☐ No

D2. If yes, which activity? ☐ Farming ☐ Fishing ☐ Swimming ☐ Washing ☐ Other: ______

D3. How often do you visit such water bodies? ☐ Daily ☐ Weekly ☐ Monthly ☐ Rarely

D4. Do you have relatives or neighbors with similar wounds? ☐ Yes ☐ No

D5. Have you heard of Buruli ulcer before this study? ☐ Yes ☐ No

D6. If yes, from where? ☐ Health worker ☐ Radio ☐ TV ☐ Community meeting ☐ Friend/Relative ☐ Other: ______

## Section E: Consent and Interviewer Information

E1. Was participant consent obtained? ☐ Yes ☐ No

E2. For participants <18 years: Was parent/guardian consent obtained? ☐ Yes ☐ No

E3. Was assent obtained (if <18 years)? ☐ Yes ☐ No

E4. Name of interviewer: __________________________

E5. Date of interview: ____ / ____ / ______
